# Supplementary material
Source: Springer Nature journal article supplement (https://www.springermedizin.de/resource/supplementary/12891_2008_575_MOESM5_ESM.pdf/9511368)

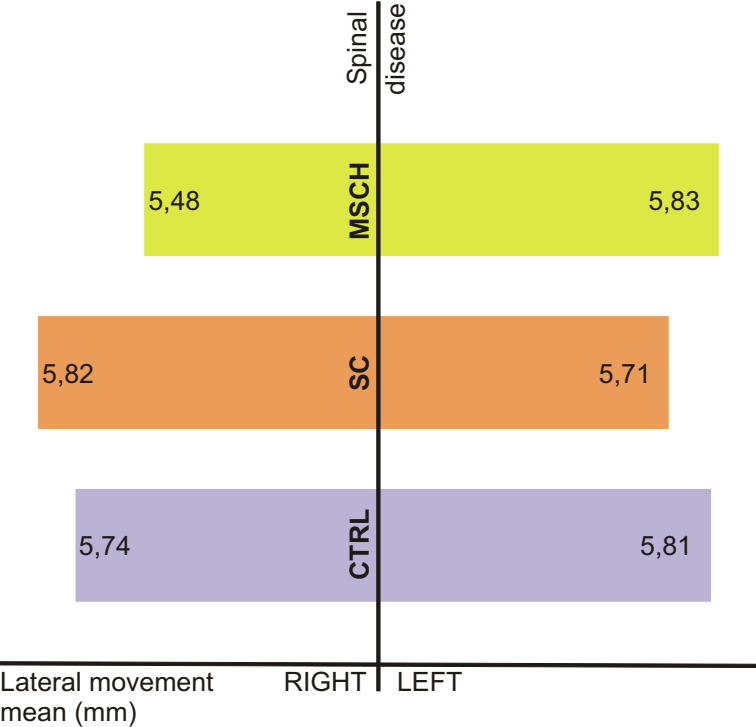

Supplement: MOESM5 [file 9511368]
